# Supplementary material for: Modulation of Crystallinity through Radiofrequency Electromagnetic Fields in PLLA/Magnetic Nanoparticles Composites: A Proof of Concept
Source: MDPI journal article supplement (doi:10.3390/ma14154300), 2021-07-31
Supplement: s1 [file s1]

Supplementary Materials

# Modulation of Crystallinity through Radiofrequency Electromagnetic Fields in PLLA/Magnetic Nanoparticles Composites: A Proof of Concept

Marta Multigner <sup>1,\*</sup>, Irene Morales <sup>2</sup>, Marta Muñoz <sup>1</sup>, Victoria Bonache <sup>1</sup>, Fernando Giacomone <sup>2</sup>, Patricia de la Presa <sup>2</sup>, Rosario Benavente <sup>3</sup>, Belén Torres <sup>1</sup>, Diego Mantovani <sup>4</sup> and Joaquín Rams <sup>1</sup>

<sup>1</sup> Department of Applied Mathematics, Materials Science and Engineering and Electronic Technology, Universidad Rey Juan Carlos, 28933 Madrid, Spain; marta.munoz@urjc.es (M.M.); victoria.bonache@urjc.es (V.B.); belen.torres@urjc.es (B.T.); joaquin.rams@urjc.es (J.R.)

<sup>2</sup> Instituto de Magnetismo Aplicado, UCM-ADIF-CSIC, A6 22,500 Km, 28230 Las Rozas, Spain; irenemorales@ucm.es (I.M.); giacomone@gmx.es (F.G.); pmpresa@ucm.es (P.d.l.P.)

<sup>3</sup> Institute of Polymer Science and Technology (ICTP-CSIC), C/Juan de la Cierva 3, 28006 Madrid, Spain; rbenavente@ictp.csic.es

<sup>4</sup> Laboratory for Biomaterials & Bioengineering (CRC-I), Department Min-Met-Materials Engineering & Research Center CHU de Québec, Laval University, Québec, QC G1V 0A6, Canada; diego.mantovani@gmn.ulaval.ca

\* Correspondence: marta.multigner@urjc.

**Citation:** Multigner, M.; Morales, I.; Muñoz, M.; Bonache, V.; Giacomone, F.; de la Presa, P.; Benavente, R.; Torres, B.; Mantovani, D.; Rams, J. Modulation of Crystallinity through Radiofrequency Electromagnetic Fields in PLLA/Magnetic Nanoparticles Composites: A Proof of Concept. *Materials* **2021**, *14*, 4300. <https://doi.org/10.3390/ma14154300>

Academic Editor: Hansang Kwon

Received: 24 June 2021

Accepted: 29 July 2021

Published: 31 July 2021

**Publisher's Note:** MDPI stays neutral with regard to jurisdictional claims in published maps and institutional affiliations.

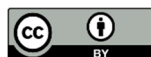

**Copyright:** © 2021 by the authors. Licensee MDPI, Basel, Switzerland. This article is an open access article distributed under the terms and conditions of the Creative Commons Attribution (CC BY) license (<http://creativecommons.org/licenses/by/4.0/>).

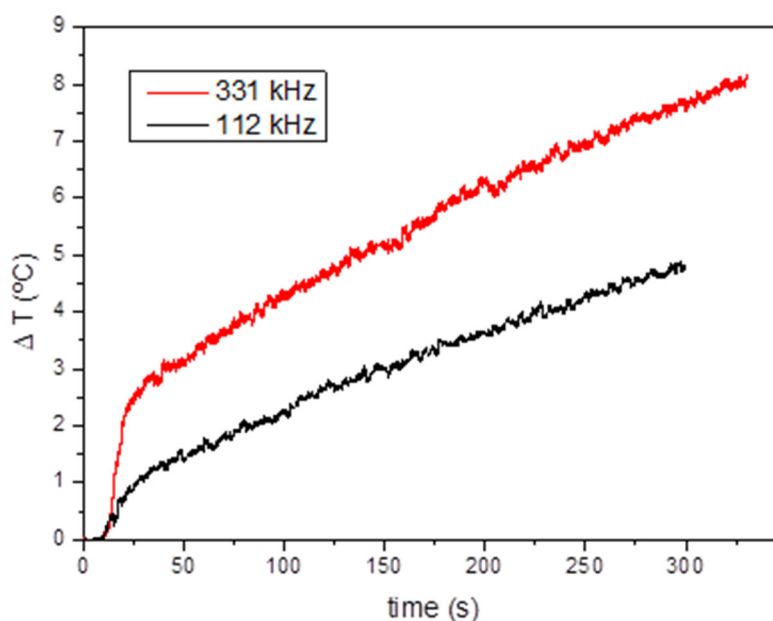

**Figure S1.** Heating curves of PLLA9Mn samples during the EMF treatment recorded by infrared camera.

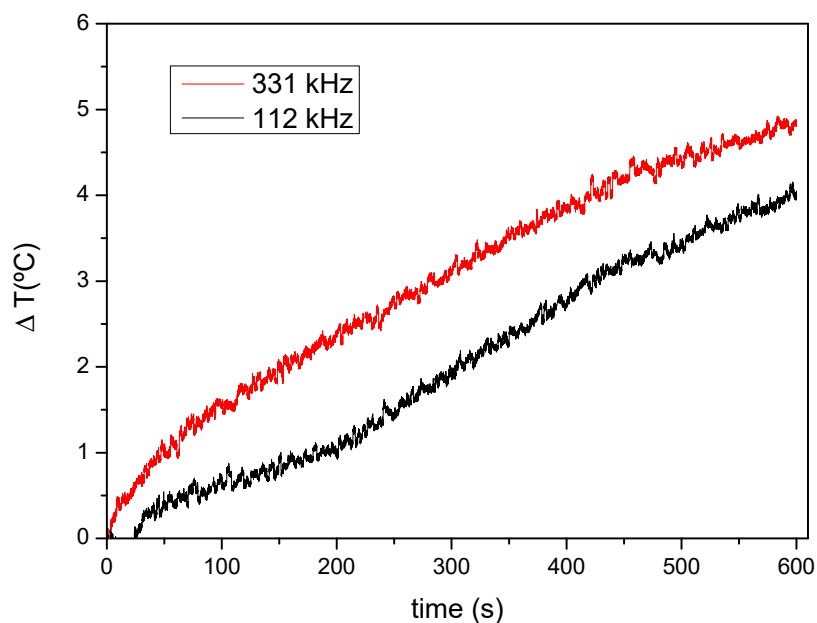

**Figure S2.** Heating curves of PLLA13Fe samples during the EMF treatment recorded by infrared camera.

**Table S1.** Representative bands of PLA and corresponding region in FTIR spectroscopy.

| Region                               | Group or Bond                                          |
|--------------------------------------|--------------------------------------------------------|
| $\geq 3000\text{ cm}^{-1}$ (missing) | –OH stretching vibration (carboxyl acids and alcohols) |
| $3000\text{--}2800\text{ cm}^{-1}$   | CH region                                              |
| $1749\text{ cm}^{-1}$                | C=O stretching vibration of the carbonyl group         |
| $1456\text{ cm}^{-1}$                | Asymmetric bending of the $\text{CH}_3$                |
| $1361\text{ cm}^{-1}$                | Symmetric bending of the $\text{CH}_3$                 |
| $1182\text{ cm}^{-1}$                | Asymmetric rocking of $\text{CH}_3$                    |
| $1130\text{ cm}^{-1}$                | Symmetric rocking of $\text{CH}_3$                     |
| $1083\text{ cm}^{-1}$                | Asymmetric stretching vibration of O–CO–O              |
| $1045\text{ cm}^{-1}$                | Stretching of C– $\text{CH}_3$                         |
